# Supplementary material for: Energetics and carrier transport in doped Si/SiO2quantum dots
Source: Royal Society of Chemistry journal article supplement (doi:10.1039/c5nr02616d), 2015-01-01
Supplement: c5nr02616d1.pdf [file c5nr02616d1.pdf]

– Electronic Supplementary Information –  
**Energetics and carrier transport in  
doped Si/SiO<sub>2</sub> quantum dots**

Nuria Garcia-Castello<sup>1</sup>, Sergio Illera<sup>1</sup>, Joan Daniel Prades<sup>1</sup>,  
Stefano Ossicini<sup>2</sup>, Albert Cirera<sup>1</sup>, and Roberto Guerra<sup>3,4</sup>

<sup>1</sup>*MIND-IN<sup>2</sup> UB, Departament of Electronics, Universitat de Barcelona, C/Martí i Franquès 1, E-08028 Barcelona, Spain.*

<sup>2</sup>*Dipartimento di Scienze e Metodi dell’Ingegneria and Centro Interdipartimentale En&Tech, Università di Modena e Reggio Emilia, via Amendola 2 Pad. Morselli, I-42122 Reggio Emilia, Italy.*

<sup>3</sup>*International School for Advanced Studies (SISSA), Via Bonomea 265, I-34136 Trieste, Italy.*

<sup>4</sup>*CNR-IOM Democritos National Simulation Center, Via Bonomea 265, I-34136 Trieste, Italy.*

|       | Si <sub>32</sub> | Si <sub>35</sub> | Si <sub>47</sub> |
|-------|------------------|------------------|------------------|
| $E_g$ | 2.74             | 1.82             | 2.01             |
| EB    | 3.82             | 3.46             | 3.40             |
| HB    | 4.41             | 4.76             | 4.82             |

TABLE S1: Undoped structures: HOMO-LUMO gap  $E_g$ , electron- and hole- barrier (EB, HB) – corrected values (see Method). All values are expressed in eV.

| Si <sub>32</sub> | B-dot | B-int-1 | B-int-2        | <b>B-int-3</b> | B-silica | Si <sub>32</sub> | <b>P-dot</b> | P-int-1 | P-int-2 | P-int-3 | P-silica |
|------------------|-------|---------|----------------|----------------|----------|------------------|--------------|---------|---------|---------|----------|
| $E_g$            | 0.64  | 0.78    | —              | <b>0.70</b>    | 2.66     | $E_g$            | <b>0.60</b>  | 0.29    | —       | 0.25    | 0.10     |
| EB               | 3.91  | 3.68    | —              | <b>3.42</b>    | 3.96     | EB               | <b>3.27</b>  | 2.76    | —       | 2.73    | 2.38     |
| HB               | 4.31  | 4.54    | —              | <b>4.80</b>    | 4.26     | HB               | <b>4.95</b>  | 5.46    | —       | 5.49    | 5.84     |
| $\Delta_{HOMO}$  | 0.96  | 1.12    | —              | <b>1.42</b>    | -0.10    | $\Delta_{HOMO}$  | <b>1.63</b>  | 2.28    | —       | 2.34    | 2.76     |
| $\Delta_{LUMO}$  | -1.16 | -0.86   | —              | <b>-0.65</b>   | -0.20    | $\Delta_{LUMO}$  | <b>-0.54</b> | -0.19   | —       | -0.17   | -0.10    |
| $\Delta E_F$     | -0.10 | 0.13    | —              | <b>0.39</b>    | -0.15    | $\Delta E_F$     | <b>0.54</b>  | 1.05    | —       | 1.08    | 1.43     |
| Si <sub>35</sub> | B-dot | B-int-1 | <b>B-int-2</b> | B-int-3        | B-silica | Si <sub>35</sub> | <b>P-dot</b> | P-int-1 | P-int-2 | P-int-3 | P-silica |
| $E_g$            | 1.96  | 0.13    | <b>0.50</b>    | —              | 1.78     | $E_g$            | <b>0.00</b>  | 0.00    | 0.34    | —       | 0.00     |
| EB               | 3.49  | 4.24    | <b>3.46</b>    | —              | 3.78     | EB               | <b>3.10</b>  | 2.81    | 3.09    | —       | 2.46     |
| HB               | 4.74  | 3.99    | <b>4.76</b>    | —              | 4.45     | HB               | <b>5.12</b>  | 5.41    | 5.13    | —       | 5.77     |
| $\Delta_{HOMO}$  | 0.02  | 0.19    | <b>0.78</b>    | —              | -0.17    | $\Delta_{HOMO}$  | <b>1.39</b>  | 1.68    | 1.23    | —       | 2.03     |
| $\Delta_{LUMO}$  | 0.16  | -1.50   | <b>-0.54</b>   | —              | -0.22    | $\Delta_{LUMO}$  | <b>-0.43</b> | -0.14   | -0.24   | —       | 0.22     |
| $\Delta E_F$     | -0.02 | -0.77   | <b>0.00</b>    | —              | -0.31    | $\Delta E_F$     | <b>0.36</b>  | 0.65    | 0.37    | —       | 1.01     |
| Si <sub>47</sub> | B-dot | B-int-1 | B-int-2        | <b>B-int-3</b> | B-silica | Si <sub>47</sub> | <b>P-dot</b> | P-int-1 | P-int-2 | P-int-3 | P-silica |
| $E_g$            | 2.03  | 0.20    | 0.48           | <b>0.58</b>    | 1.96     | $E_g$            | <b>0.12</b>  | 0.00    | 0.35    | 0.56    | 0.00     |
| EB               | 3.38  | 4.18    | 3.58           | <b>3.38</b>    | 3.57     | EB               | <b>3.07</b>  | 2.69    | 3.04    | 3.41    | 3.63     |
| HB               | 4.85  | 4.04    | 4.64           | <b>4.84</b>    | 4.65     | HB               | <b>5.15</b>  | 5.54    | 5.18    | 4.82    | 4.59     |
| $\Delta_{HOMO}$  | 0.04  | 0.15    | 0.61           | <b>0.76</b>    | -0.12    | $\Delta_{HOMO}$  | <b>1.30</b>  | 1.74    | 1.21    | 0.75    | 0.79     |
| $\Delta_{LUMO}$  | 0.06  | -1.66   | -0.92          | <b>-0.67</b>   | -0.17    | $\Delta_{LUMO}$  | <b>-0.59</b> | -0.26   | -0.44   | -0.70   | -1.21    |
| $\Delta E_F$     | 0.02  | -0.78   | -0.18          | <b>0.02</b>    | -0.17    | $\Delta E_F$     | <b>0.33</b>  | 0.71    | 0.36    | -0.01   | -0.24    |

TABLE S2: Doped structures: HOMO-LUMO gap  $E_g$ ; electron- and hole- barrier (EB, HB) – corrected values (see Method); shift of HOMO, LUMO, and  $E_F$  levels with respect to the undoped counterpart ( $\Delta_{HOMO}$ ,  $\Delta_{LUMO}$ , and  $\Delta E_F$ , respectively). All values are expressed in eV, with bold text highlighting the most stable configuration.

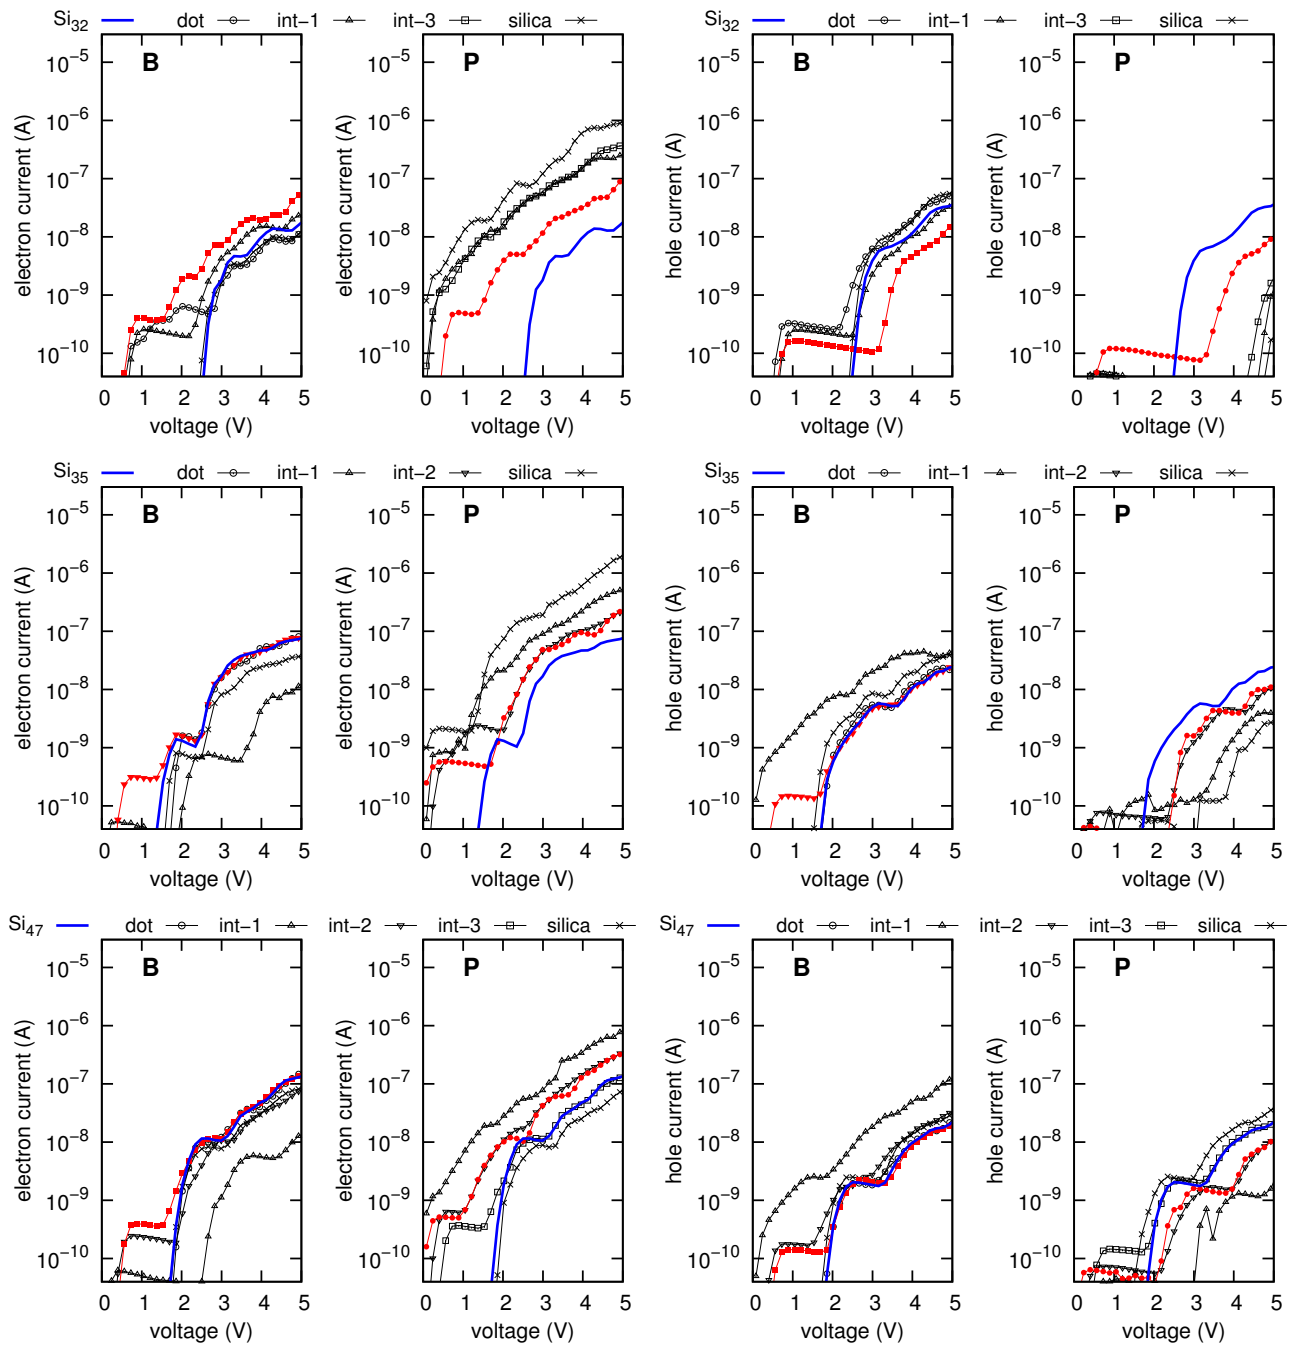

FIGURE S1: Separate electron and hole currents as a function of the applied voltage, for the considered doped configurations (symbols) along with the undoped case (blue solid curve), for Si<sub>32</sub> (top), Si<sub>35</sub> (center), and Si<sub>47</sub> (bottom) QDs. Filled symbols (in red) highlight the most stable doped configuration.
